# Supplementary material
Source: PubMed Central journal article supplement (PMC2735361)
Supplement: fj.08-128447_1.pdf [file fj.08-128447_1.pdf]

## Supplemental Figure S1

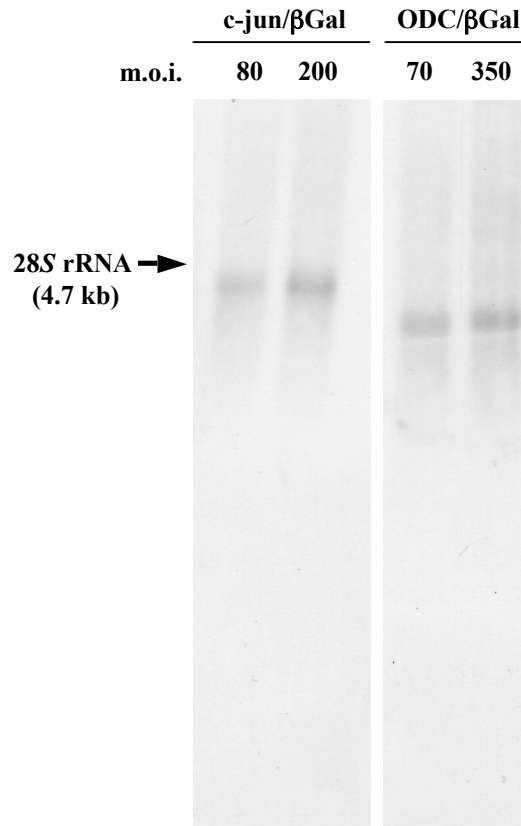

**Figure S1.** Expression of  $\beta$ Gal reporter mRNAs in adult cardiocytes. Cardiocytes were infected with reporter adenovirus at the indicated m.o.i. Total RNA was extracted after 48 h, and approximately 10  $\mu$ g per lane was used for Northern blotting with a cDNA probe for  $\beta$ Gal mRNA. The arrows indicate the position of 28S rRNA as detected by staining with ethidium bromide. Similar results were obtained in two additional experiments.

## Supplemental Figure S2

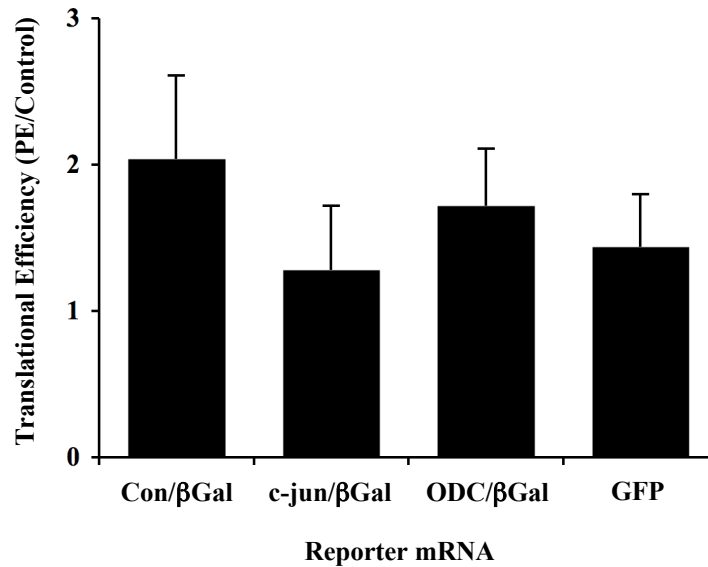

**Figure S2.** Effects of the  $\alpha_1$ -adrenergic agonist PE on translational efficiency of reporter mRNAs. Quiescent cardiocytes were infected with increasing titers of either Con/ $\beta$ Gal, c-jun/ $\beta$ Gal or ODC/ $\beta$ Gal adenovirus and subsequently maintained over 48 h in the presence or absence of 10  $\mu$ M PE. Translational efficiency of each reporter mRNA (protein/mRNA) in PE-treated cardiocytes was normalized to its companion group of non-treated controls. Values are the mean $\pm$ S.E., n=4 experiments.

### Supplemental Figure S3

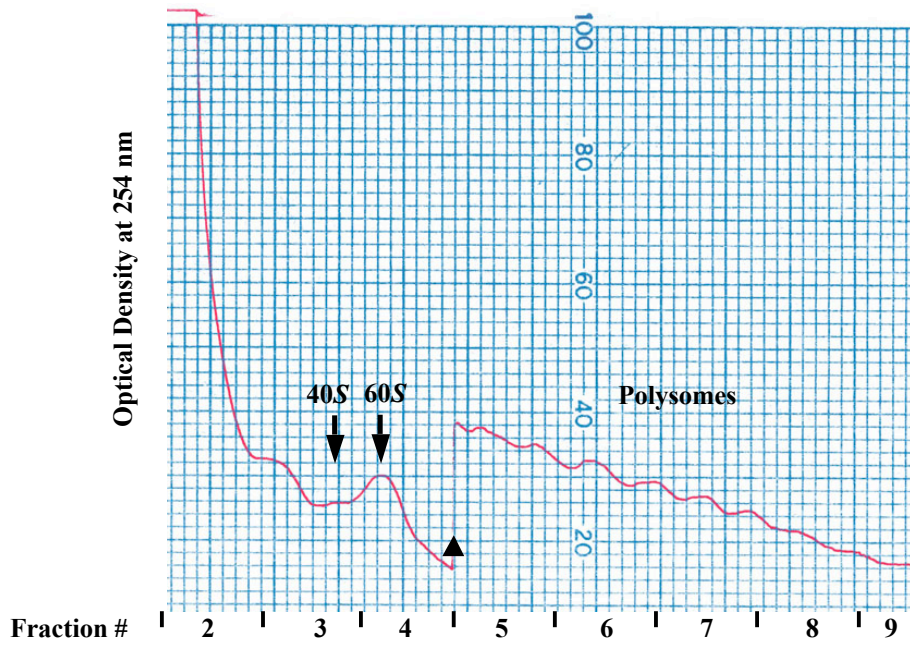

**Figure S3.** Representative absorbance profile of cardiocyte homogenates resolved on 15% to 50% linear sucrose gradients. Individual fractions are delineated along the bottom of the trace. Fraction 1 (not shown) is off the scale. The arrowhead indicates that the sensitivity of the detector was increased by a factor of 2.5 to better visualize the size of individual polysomes.

**Table 1.** Primers used for quantifying RNA levels in cardiocytes by real-time RT-PCR

| RNA              | Primer Sequences                             | PCR Product (bp) |
|------------------|----------------------------------------------|------------------|
| $\beta$ Gal mRNA | 2445-Forward 5'-CGACATTGGCGTAAGTGAAGC-3'     | 139              |
|                  | 2584-Reverse 5'-TCGTAATCAGCACCGCATCAG-3'     |                  |
| GFP mRNA         | 346-Forward 5'-CTCGATGCGGTTACCCAGG-3'        | 180              |
|                  | 526-Reverse 5'-GACCTACGGCGTGCAGTGC-3'        |                  |
| 18S rRNA         | 110-Forward 5'-TATGGTTCCTTTGGTCGCTC-3'       | 130              |
|                  | 240-Reverse 5'GGTTGGTTTTGATCTGATCTGATAAAT-3' |                  |
| GAPDH mRNA       | 354-Forward 5'-AGGTCATCCCAGAGCTGAAC-3'       | 137              |
|                  | 491-Reverse 5'-CCTGCTTCACCACCTTCTTG-3'       |                  |

**Table 2.** Structural features of 5'-UTRs of mRNAs encoding transcription factors

| 5'-UTR                                          | 2° Structure<br>( $\Delta G$ ) | G+C<br>(%) | Length<br>(nt) |
|-------------------------------------------------|--------------------------------|------------|----------------|
| GATA4                                           | -85                            | 51.5       | 301            |
| Serum Response Factor (SRF)                     | -195                           | 79.1       | 358            |
| Upstream Binding Factor<br>(UBF1 & UBF2)        | -121                           | 62.0       | 266            |
| Nuclear Factor of<br>Activated T Cells (NF-ATc) | -130                           | 80.3       | 239            |
| c-myc                                           | -249                           | 64.5       | 558            |
| c-fos                                           | -44                            | 64.5       | 152            |
| MEF2C                                           | -121                           | 46.5       | 426            |
| MEF2D                                           | -161                           | 68.7       | 390            |
| Myocardin                                       | -112                           | 64.0       | 292            |
